# Supplementary material for: A novel cobalt-free cathode material for proton-conducting solid oxide fuel cells
Source: Royal Society of Chemistry journal article supplement (doi:10.1039/c2jm32627b), 2012-01-01
Supplement: c2jm32627b.pdf [file c2jm32627b.pdf]

## Supporting information

**Table S1** Summary of the reported maximum power density of laboratory SOFC-H with hydrogen as fuel in recent years.

| Year | Anode                                                                                         | Electrolyte                                                                               | Cathode                                                                                                                                                               | T (°C) | P <sub>max</sub> (mW cm <sup>-2</sup> ) | Ref.  |
|------|-----------------------------------------------------------------------------------------------|-------------------------------------------------------------------------------------------|-----------------------------------------------------------------------------------------------------------------------------------------------------------------------|--------|-----------------------------------------|-------|
| 2005 | Pd                                                                                            | BaCe <sub>0.8</sub> Y <sub>0.2</sub> O <sub>3-δ</sub>                                     | Perovskite                                                                                                                                                            | 600    | 1400                                    | [S1]  |
| 2006 | Ni-BaCe <sub>0.8</sub> Sm <sub>0.2</sub> O <sub>3-δ</sub>                                     | BaCe <sub>0.8</sub> Sm <sub>0.2</sub> O <sub>3-δ</sub>                                    | Ba <sub>0.5</sub> Sr <sub>0.5</sub> Co <sub>0.8</sub> Fe <sub>0.2</sub> O <sub>3-δ</sub>                                                                              | 700    | 340                                     | [S2]  |
| 2006 | Ni-BaCe <sub>0.8</sub> Gd <sub>0.2</sub> O <sub>3-δ</sub>                                     | BaCe <sub>0.8</sub> Gd <sub>0.2</sub> O <sub>3-δ</sub>                                    | La <sub>0.5</sub> Sr <sub>0.5</sub> CoO <sub>3-δ</sub>                                                                                                                | 700    | 371                                     | [S3]  |
| 2006 | Ni-BaCe <sub>0.7</sub> Zr <sub>0.1</sub> Y <sub>0.2</sub> O <sub>3-δ</sub>                    | BaCe <sub>0.7</sub> Zr <sub>0.1</sub> Y <sub>0.2</sub> O <sub>3-δ</sub>                   | BaCe <sub>0.4</sub> Pr <sub>0.4</sub> Y <sub>0.2</sub> O <sub>3-δ</sub>                                                                                               | 700    | 270                                     | [S4]  |
| 2007 | Ni-BaCe <sub>0.9</sub> Nd <sub>0.1</sub> O <sub>3-δ</sub>                                     | BaCe <sub>0.9</sub> Nd <sub>0.1</sub> O <sub>3-δ</sub>                                    | La <sub>0.5</sub> Sr <sub>0.5</sub> CoO <sub>3-δ</sub> -BaCe <sub>0.9</sub> Nd <sub>0.1</sub> O <sub>3-δ</sub>                                                        | 700    | 335                                     | [S5]  |
| 2008 | Ni- BaCe <sub>0.7</sub> Zr <sub>0.1</sub> Y <sub>0.2</sub> O <sub>3-δ</sub>                   | BaCe <sub>0.7</sub> Zr <sub>0.1</sub> Y <sub>0.2</sub> O <sub>3-δ</sub>                   | GdBaCo <sub>2</sub> O <sub>5+δ</sub>                                                                                                                                  | 700    | 266                                     | [S6]  |
| 2008 | Ni- BaCe <sub>0.9</sub> Y <sub>0.1</sub> O <sub>3-δ</sub>                                     | BaCe <sub>0.9</sub> Y <sub>0.1</sub> O <sub>3-δ</sub>                                     | Ba <sub>0.5</sub> Sr <sub>0.5</sub> Co <sub>0.8</sub> Fe <sub>0.2</sub> O <sub>3-δ</sub>                                                                              | 700    | 550                                     | [S7]  |
| 2008 | Ni- BaCe <sub>0.7</sub> Zr <sub>0.1</sub> Y <sub>0.2</sub> O <sub>3-δ</sub>                   | BaCe <sub>0.7</sub> Zr <sub>0.1</sub> Y <sub>0.2</sub> O <sub>3-δ</sub>                   | Sm <sub>0.5</sub> Sr <sub>0.5</sub> CoO <sub>3-δ</sub> -BaCe <sub>0.7</sub> Zr <sub>0.1</sub> Y <sub>0.2</sub> O <sub>3-δ</sub>                                       | 700    | 725                                     | [S8]  |
| 2009 | Ni- BaCe <sub>0.7</sub> Zr <sub>0.1</sub> Y <sub>0.2</sub> O <sub>3-δ</sub>                   | BaCe <sub>0.7</sub> Zr <sub>0.1</sub> Y <sub>0.2</sub> O <sub>3-δ</sub>                   | SmBaCo <sub>2</sub> O <sub>5+δ</sub>                                                                                                                                  | 700    | 382                                     | [S9]  |
| 2009 | Ni- BaCe <sub>0.7</sub> Zr <sub>0.1</sub> Y <sub>0.2</sub> O <sub>3-δ</sub>                   | BaCe <sub>0.7</sub> Zr <sub>0.1</sub> Y <sub>0.2</sub> O <sub>3-δ</sub>                   | PrBaCo <sub>2</sub> O <sub>5+δ</sub>                                                                                                                                  | 700    | 545                                     | [S10] |
| 2009 | Ni- BaCe <sub>0.7</sub> Zr <sub>0.1</sub> Y <sub>0.2</sub> O <sub>3-δ</sub>                   | BaCe <sub>0.7</sub> Zr <sub>0.1</sub> Y <sub>0.2</sub> O <sub>3-δ</sub>                   | BaCe <sub>0.5</sub> Bi <sub>0.5</sub> O <sub>3-δ</sub>                                                                                                                | 700    | 321                                     | [S11] |
| 2009 | Ni- BaCe <sub>0.7</sub> Zr <sub>0.1</sub> Y <sub>0.1</sub> Yb <sub>0.1</sub> O <sub>3-δ</sub> | BaCe <sub>0.7</sub> Zr <sub>0.1</sub> Y <sub>0.1</sub> Yb <sub>0.1</sub> O <sub>3-δ</sub> | La <sub>0.8</sub> Sr <sub>0.2</sub> Co <sub>0.2</sub> Fe <sub>0.8</sub> O <sub>3-δ</sub> -<br>BaCe <sub>0.7</sub> Zr <sub>0.1</sub> Y <sub>0.2</sub> O <sub>3-δ</sub> | 700    | 1100                                    | [S12] |
| 2010 | Ni- BaCe <sub>0.7</sub> Zr <sub>0.1</sub> Y <sub>0.2</sub> O <sub>3-δ</sub>                   | BaCe <sub>0.7</sub> Zr <sub>0.1</sub> Y <sub>0.2</sub> O <sub>3-δ</sub>                   | PrBaCo <sub>2</sub> O <sub>5+δ</sub>                                                                                                                                  | 700    | 520                                     | [S13] |
| 2010 | Ni- BaCe <sub>0.7</sub> Zr <sub>0.1</sub> Y <sub>0.2</sub> O <sub>3-δ</sub>                   | BaCe <sub>0.7</sub> Zr <sub>0.1</sub> Y <sub>0.2</sub> O <sub>3-δ</sub>                   | Ba <sub>0.5</sub> Sr <sub>0.5</sub> Co <sub>0.8</sub> Fe <sub>0.2</sub> O <sub>3-δ</sub>                                                                              | 700    | 420                                     | [S14] |
| 2011 | Ni- BaCe <sub>0.7</sub> Zr <sub>0.1</sub> Y <sub>0.2</sub> O <sub>3-δ</sub>                   | BaCe <sub>0.7</sub> Zr <sub>0.1</sub> Y <sub>0.2</sub> O <sub>3-δ</sub>                   | BaCe <sub>0.7</sub> Zr <sub>0.1</sub> Co <sub>0.2</sub> O <sub>3-δ</sub>                                                                                              | 700    | 370                                     | [S15] |
| 2012 | Ni- BaCe <sub>0.7</sub> Zr <sub>0.1</sub> Y <sub>0.2</sub> O <sub>3-δ</sub>                   | BaCe <sub>0.7</sub> Zr <sub>0.1</sub> Y <sub>0.2</sub> O <sub>3-δ</sub>                   | BaCo <sub>0.7</sub> Fe <sub>0.2</sub> Nb <sub>0.1</sub> O <sub>3-δ</sub>                                                                                              | 700    | 585                                     | [S16] |

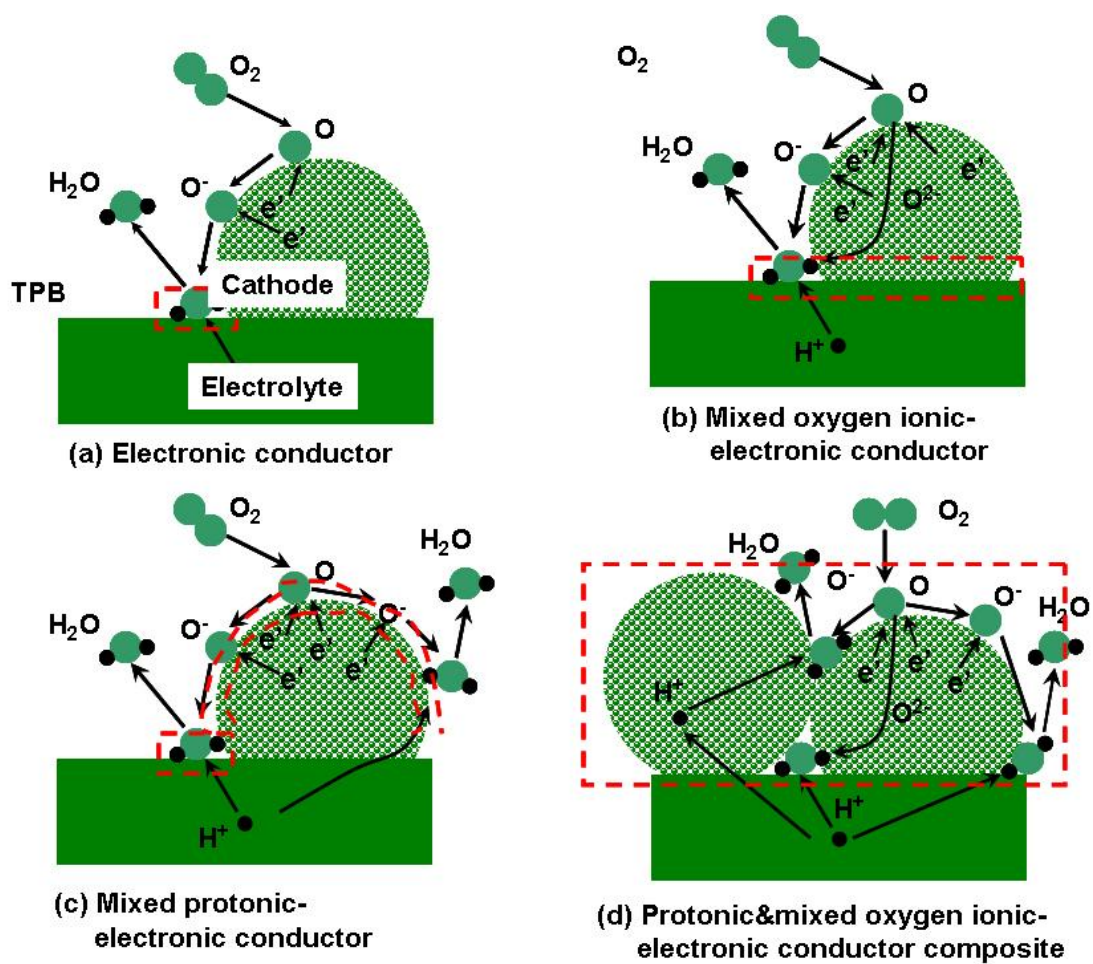

Fig. S1 Reaction mechanism of different cathodes for proton conducting SOFC.

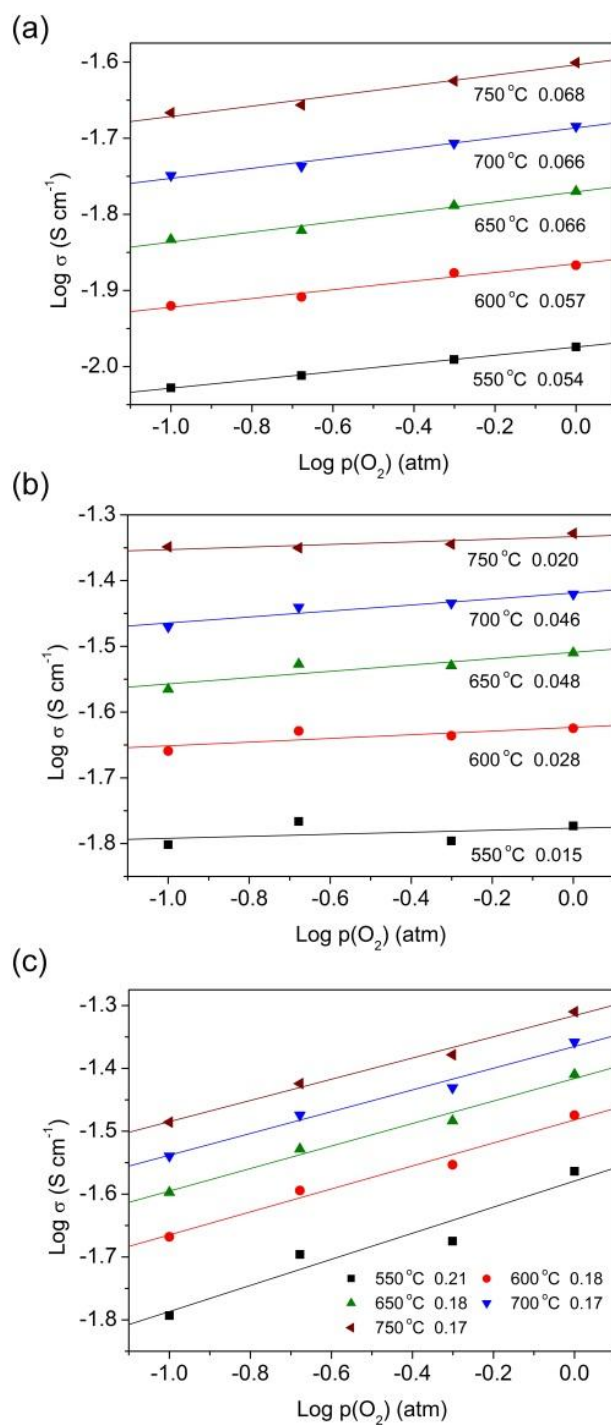

**Fig. S2** Dependence of electrical conductivity of symmetrical cell (a), BCS (b) and BCSF

(c) on  $p(\text{O}_2)$ . The  $n$  values in  $\sigma = k p(\text{O}_2)^n$  are inset.

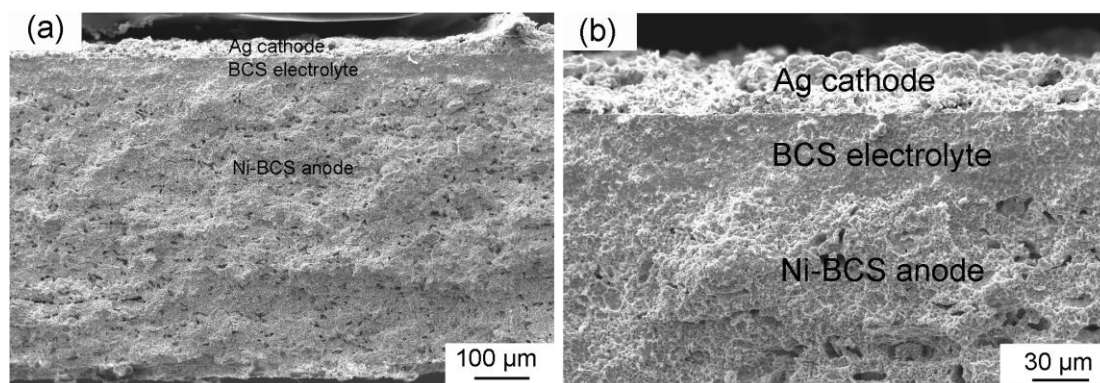

**Fig. S3** Microstructure of the Ni-BCS|BCS|Ag cell after test.

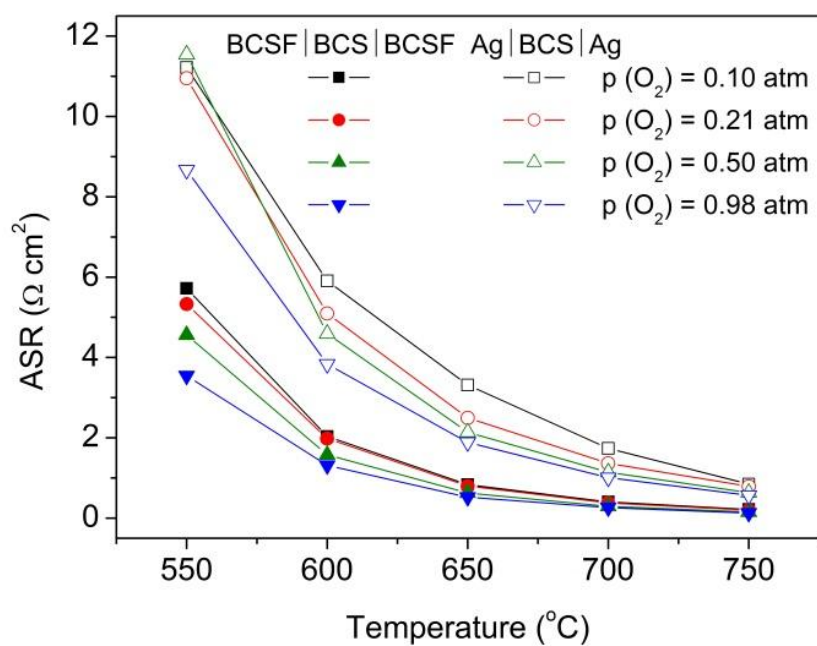

**Fig. S4** Comparison of ASR of symmetrical cells with BCSF and Ag electrode, respectively.

## Supporting References

- [S1] N. Ito, M. Iijima, K. Kimura and S. Iguchi, *J. Power Sources*, 2005, **152**, 200-203.
- [S2] R. Peng, Y. Wu, L. Yang and Z. Mao, *Solid State Ionics*, 2006, **177**, 389-393.
- [S3] Q. Ma, R. Peng, Y. Lin, J. Gao and G. Meng, *J. Power Sources*, 2006, **161**, 95-98.
- [S4] C. Zuo, S. Zha, M. Liu, M. Hatano and M. Uchiyama, *Adv. Mater.*, 2006, **18**, 3318-3320.
- [S5] K. Xie, Q. Ma, B. Lin, Y. Jiang, J. Gao, X. Liu and G. Meng, *J. Power Sources*, 2007, **170**, 38-41.
- [S6] B. Lin, S. Zhang, L. Zhang, L. Bi, H. Ding, X. Liu, J. Gao and G. Meng, *J. Power Sources*, 2008, **177**, 330-333.
- [S7] Y. Lin, R. Ran, Y. Zheng, Z. Shao, W. Jin, N. Xu and J. Ahn, *J. Power Sources*, 2008, **180**, 15-22.
- [S8] L. Yang, C. Zuo, S. Wang, Z. Cheng and M. Liu, *Adv. Mater.*, 2008, **20**, 3280-3283.
- [S9] B. Lin, Y. Dong, R. Yan, S. Zhang, M. Hu, Y. Zhou and G. Meng, *J. Power Sources*, 2009, **186**, 446-449.
- [S10] L. Zhao, B. He, B. Lin, H. Ding, S. Wang, Y. Ling, R. Peng, G. Meng and X. Liu, *J. Power Sources*, 2009, **194**, 835-837.
- [S11] Z. Tao, L. Bi, L. Yan, W. Sun, Z. Zhu, R. Peng and W. Liu, *Electrochem. Commun.*, 2009, **11**, 688-690.

[S12] L. Yang, S. Wang, K. Blinn, M. Liu, Z. Liu, Z. Cheng and M. Liu, *Science*,

2009, **326**, 126-129.

[S13] Y. Lin, R. Ran, C. Zhang, R. Cai and Z. Shao, *J. Phys. Chem. A*, 2010, **114**,

3764-3772.

[S14] Y. Lin, R. Ran, Y. Guo, W. Zhou, R. Cai, J. Wang and Z. Shao, *Inter. J.*

*Hydrogen Energy*, 2010, **35**, 2637-2642.

[S15] L. Yang, S. Wang, X. Lou and M. Liu, *Inter. J. Hydrogen Energy*, 2011, **36**,

2266-2270.

[S16] Y. Lin, W. Zhou, J. Sunarso, R. Ran and Z. Shao, *Inter. J. Hydrogen Energy*,

2012, **37**, 484-497.
